# Supplementary material
Source: Elsevier journal article supplement (https://www.sciencedirect.com/science/article/pii/S2173574318300480)
Supplement: mmc1 [file S2173574318300480:mmc1.pdf]

## **ESTRUCTURA DE TEMAS PARA GRUPOS DE DISCUSIÓN.**

### **1. Estructuras**

- Dotaciones
- Materiales y de personal
- Cambios tendencia ingresos y tratamientos

### **2. Estructura de las Unidades de Hospital de Día**

- Especialización
- Accesibilidad
- Dependencias
- Módulos
- Horarios
- Turnos
- Agendas/ información electrónica
- Protocolos de responsabilidad
- Coordinación
- Especialidad
- Médico
- Enfermería
- Formación específica reumatológica
- Experiencia
- Auxiliar enfermería
- Procedimientos administrativos
- Distancia farmacia - Unidades de Hospital de Día
- Mejoras

### **3. Procesos de las Unidades de Hospital de Día**

- Necesidad de plan de calidad y otras normas escritas
- Servicio información telefónica a pacientes
- Trato adecuado a pacientes
- Educación sanitaria a pacientes y cuidadores
- Proceso asistencial al paciente
- Protocolos de actuación
- Plan de contingencia
- Evaluación a profesionales sanitarios
- Check-list
- Comunicación entre niveles asistenciales
- Sesiones clínicas UHdD
- Formación enfermeras y auxiliares
- Coordinación sociosanitaria

### **4. Resultados UHdD**

- Listas de espera para inicio del tratamiento
- Registros tratamientos y nº pacientes atendidos
- Tiempos tratamientos
- Otras evaluaciones
- Certificación ISO
- Aportaciones
